# Hippocampal CA3 Transcriptome Signature Correlates with Initial Precipitating Injury in Refractory Mesial Temporal Lobe Epilepsy

Silvia Y. Bando<sup>1</sup>, Maryana C. Alegro<sup>2</sup>, Edson Amaro Jr<sup>3</sup>, Alexandre V. Silva<sup>4</sup>, Luiz H. M. Castro<sup>5</sup>, Hung-Tzu Wen<sup>6</sup>, Leandro de A. Lima<sup>7</sup>, Helena Brentani<sup>8</sup>, Carlos Alberto Moreira-Filho<sup>1\*</sup>

**1** Department of Pediatrics, Faculdade de Medicina da Universidade de São Paulo (FMUSP), São Paulo, São Paulo, Brazil, **2** Laboratory of Integrated Systems, Escola Politécnica da Universidade de São Paulo, São Paulo, São Paulo, Brazil, **3** Department of Radiology, Faculdade de Medicina da Universidade de São Paulo (FMUSP), São Paulo, São Paulo, Brazil, **4** Department of Biosciences, Universidade Federal de São Paulo, Santos, São Paulo, Brazil, **5** Clinical Neurology Division, Hospital das Clínicas da Faculdade de Medicina da Universidade de São Paulo, São Paulo, São Paulo, Brazil, **6** Epilepsy Surgery Group, Hospital das Clínicas da Faculdade de Medicina da Universidade de São Paulo, São Paulo, São Paulo, Brazil, **7** Laboratory of Biotechnology, Hospital do Câncer AC Camargo, São Paulo, São Paulo, Brazil, **8** Department of Psychiatry, Instituto Nacional de Psiquiatria do Desenvolvimento and Laboratório de Investigação Médica 23, Faculdade de Medicina da Universidade de São Paulo (FMUSP), São Paulo, São Paulo, Brazil

## Abstract

**Background:** Prolonged febrile seizures constitute an initial precipitating injury (IPI) commonly associated with refractory mesial temporal lobe epilepsy (RMTLE). In order to investigate IPI influence on the transcriptional phenotype underlying RMTLE we comparatively analyzed the transcriptomic signatures of CA3 explants surgically obtained from RMTLE patients with (FS) or without (NFS) febrile seizure history. Texture analyses on MRI images of dentate gyrus were conducted in a subset of surgically removed sclerotic hippocampi for identifying IPI-associated histo-radiological alterations.

**Methodology/Principal Findings:** DNA microarray analysis revealed that CA3 global gene expression differed significantly between FS and NFS subgroups. An integrative functional genomics methodology was used for characterizing the relations between GO biological processes themes and constructing transcriptional interaction networks defining the FS and NFS transcriptomic signatures and its major gene-gene links (hubs). Co-expression network analysis showed that: i) CA3 transcriptomic profiles differ according to the IPI; ii) FS distinctive hubs are mostly linked to glutamatergic signalization while NFS hubs predominantly involve GABAergic pathways and neurotransmission modulation. Both networks have relevant hubs related to nervous system development, what is consistent with cell genesis activity in the hippocampus of RMTLE patients. Moreover, two candidate genes for therapeutic targeting came out from this analysis: SSTR1, a relevant common hub in febrile and afebrile transcriptomes, and CHRM3, due to its putative role in epilepsy susceptibility development. MRI texture analysis allowed an overall accuracy of 90% for pixels correctly classified as belonging to FS or NFS groups. Histological examination revealed that granule cell loss was significantly higher in FS hippocampi.

**Conclusions/Significance:** CA3 transcriptional signatures and dentate gyrus morphology fairly correlate with IPI in RMTLE, indicating that FS-RMTLE represents a distinct phenotype. These findings may shed light on the molecular mechanisms underlying refractory epilepsy phenotypes and contribute to the discovery of novel specific drug targets for therapeutic interventions.

**Citation:** Bando SY, Alegro MC, Amaro E Jr, Silva AV, Castro LHM, et al. (2011) Hippocampal CA3 Transcriptome Signature Correlates with Initial Precipitating Injury in Refractory Mesial Temporal Lobe Epilepsy. PLoS ONE 6(10): e26268. doi:10.1371/journal.pone.0026268

**Editor:** Joseph El Khoury, Massachusetts General Hospital and Harvard Medical School, United States of America

**Received:** June 1, 2011; **Accepted:** September 23, 2011; **Published:** October 14, 2011

**Copyright:** © 2011 Bando et al. This is an open-access article distributed under the terms of the Creative Commons Attribution License, which permits unrestricted use, distribution, and reproduction in any medium, provided the original author and source are credited.

**Funding:** This work was supported by Fundação de Amparo à Pesquisa do Estado de São Paulo (FAPESP) grant no. 2005/56.446-0 and Conselho Nacional de Desenvolvimento Científico e Tecnológico (CNPq) grant no. 475051/2009-2 to CAM-F. The funders had no role in study design, data collection and analysis, decision to publish, or preparation of the manuscript.

**Competing Interests:** The authors have declared that no competing interests exist.

\* E-mail: carlos.moreira@icr.usp.br

## Introduction

Epilepsy affects 50 million people worldwide, 80% of them living in developing countries, and about 30% of the patients did not achieve remission with the available anti-epileptic drugs [1]. Mesial temporal lobe epilepsy (MTLE) is the most common partial epilepsy in adults and hippocampal sclerosis (HS) constitutes its most frequent pathological abnormality [2]. MTLE is often resistant to antiepileptic drugs (refractory epilepsy) and is associated with a

history of prolonged febrile seizures (PFS) in childhood or other initial precipitating injuries [2,3–5].

A large body of experimental data on how antecedent febrile seizures lead to MTLE emerged from studies on animal models of inflammation- and hyperthermia-induced seizures [6–10]. Some of these studies combined in vitro and animal models in order to check for pre-existing factors, such as ion channel mutations, cortical dysplasia or brain injuries. These factors may explain some but not the vast majority of MTLE cases in which children

without any identifiable predisposing factor had PFS and further developed epilepsy. Experimental investigations also focused seizure duration, showing that in animal models PFS determines an increased risk for developing MTLE [8,9]. This has been confirmed by clinical research, thus indicating that aborting febrile seizures to prevent status epilepticus is an important preventive approach [11]. Subsequently, experimental evidences rendered clear that MTLE arises after febrile seizures through a succession of events, probably starting with the release of inflammatory mediators, what is later followed by cell loss at the hippocampus, mesial temporal sclerosis and neuronal circuitry remodeling [10,12,13].

Therefore, the molecular pathomechanisms involved in PFS-induced MTLE would be provoked by inflammatory mediators and then driven by coordinate changes in the expression of hundreds of genes in the brain. With the aim of characterizing these transcriptional changes, DNA microarray methodologies were employed in a variety of animal model studies [7], together with genetic linkage studies conducted in familial PFS-cases [14]. However, for obtaining predictive biomarkers of epileptogenesis and identifying novel therapeutic targets it is mandatory to conduct gene expression studies on surgical specimens obtained from the hippocampi of patients submitted to epilepsy surgery [5,15].

Patients with refractory MTLE (RMTLE) generally undergo epilepsy surgery and brain explants obtained through this procedure are a valuable material for investigating the molecular mechanisms underlying refractory epilepsy. Studies in surgical specimens helped to reveal the pivotal role of the hippocampus for temporal lobe epilepsies and, particularly, of the dentate gyrus in several biological processes related to the startup and to the end stages of the disease [16]. Pathomorphological studies showed compromised neurogenesis and significant dentate granule cell loss in children and adult patients presenting temporal lobe epilepsy [17–19].

In order to gain a better understanding on the biological and molecular mechanisms governing RMTLE, several authors conducted gene expression studies on surgical specimens obtained from the hippocampus and entorhinal cortex of patients submitted to epilepsy surgery [20–23]. These studies, recently reviewed by Wang et al. [5], brought an impressive amount of information but also showed low consistence of data among different laboratories. In order to overcome this flaw those authors suggested that genomic profile studies should be centered in specific anatomic subregions of the hippocampus. Moreover, due to the importance of the initial precipitating injury (IPI) in MTLE development, a comparative analysis of cases with and without prolonged febrile seizure history would be very relevant. Here we pursued this kind of analysis by studying the transcriptomic profile of hippocampal CA3–CA4 transition explants obtained surgically from patients with RMTLE and HS with (FS) or without (NFS) a history of febrile seizures as the IPI. High-resolution 3T magnetic resonance imaging (MRI) texture analysis was employed in order to assess IPI-related differences in the surgical removed hippocampi of FS and NFS patients. A summary of the study work-flow is depicted in Figure 1.

## Results

### Patients' clinical and pathological data

A total of 23 patients with refractory epilepsy and mesial temporal sclerosis who underwent corticoamygdalohippocampectomy were included in this study. Their main clinical features are summarized in Table 1. None of these patients presented any evidence of mental retardation or had first-degree family members with epilepsy or febrile seizure history. Eight patients with well characterized antecedent prolonged febrile seizures that occurred within 6 months and 4 yrs of age were classified as FS cases. The average and standard error for disease onset age and IPI in this

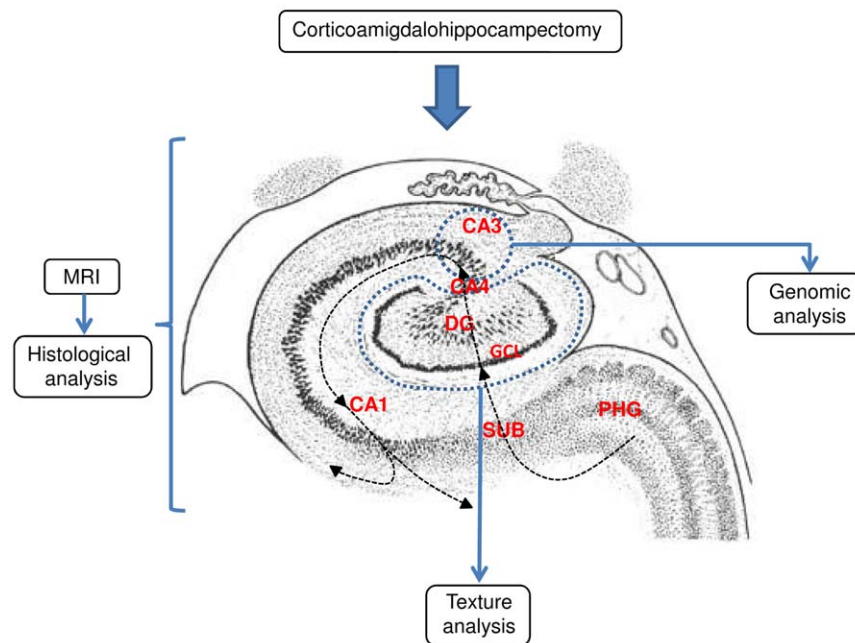

**Figure 1. Study work-flow.** During epilepsy surgery tissue explants from CA3 were obtained for genomic studies. The entire hippocampus was then resected and the specimen was submitted to MRI for texture analysis of the dentate gyrus (DG) and, subsequently, to global histological analysis. Arrowed dotted lines indicate PHG-CA1 input-output trajectory. The blue dotted line indicates CA3 and DG limits. Abbreviations: SUB subiculum; GCL, granule cell layer.

doi:10.1371/journal.pone.0026268.g001

**Table 1.** Patients' clinical and pathological data.

| Patient              | Gender | FR <sup>c</sup> | Epilepsy        |                  |            |               | Age at       | Side  |
|----------------------|--------|-----------------|-----------------|------------------|------------|---------------|--------------|-------|
|                      |        |                 | Febrile seizure | IPI (yr/mo)      | onset (yr) | duration (yr) | surgery (yr) |       |
| FS1 <sup>a</sup>     | M      | no              | yes             | 4                | 4          | 9             | 13           | right |
| FS2 <sup>a</sup>     | M      | no              | yes             | 1/8              | 7          | 18            | 25           | left  |
| FS3 <sup>b</sup>     | F      | no              | yes             | 1                | 8          | 11            | 19           | right |
| FS4 <sup>a</sup>     | M      | no              | yes             | 4                | 4          | 26            | 30           | right |
| FS5 <sup>b</sup>     | M      | 3 <sup>rd</sup> | yes             | 0/6              | 15         | 14            | 29           | left  |
| FS6 <sup>a</sup>     | F      | no              | yes             | 2                | 14         | 5             | 19           | right |
| FS7 <sup>a,b</sup>   | M      | 2 <sup>nd</sup> | yes             | 2                | 2          | 37            | 39           | left  |
| FS8 <sup>a,b</sup>   | F      | no              | yes             | 0/6              | 2          | 55            | 57           | right |
| NFS9 <sup>a</sup>    | F      | no              | no              | 7                | 7          | 21            | 28           | left  |
| NFS10 <sup>a</sup>   | M      | no              | no              | 1/6 <sup>d</sup> | 5          | 27            | 32           | left  |
| NFS11 <sup>a</sup>   | F      | no              | no              | 4 <sup>d</sup>   | 4          | 19            | 23           | left  |
| NFS12 <sup>a</sup>   | F      | no              | no              | 13               | 13         | 29            | 42           | left  |
| NFS13 <sup>b</sup>   | M      | no              | no              | 0/9 <sup>d</sup> | 8          | 20            | 28           | left  |
| NFS14 <sup>b</sup>   | F      | 2 <sup>nd</sup> | no              | 7                | 7          | 23            | 30           | right |
| NFS15 <sup>a,b</sup> | M      | 3 <sup>rd</sup> | no              | 3                | 14         | 17            | 31           | left  |
| NFS16 <sup>a,b</sup> | F      | 2 <sup>nd</sup> | no              | 29               | 29         | 15            | 44           | left  |
| NFS17 <sup>a,b</sup> | F      | 2 <sup>nd</sup> | no              | 2                | 11         | 28            | 39           | left  |
| NFS18 <sup>a</sup>   | M      | no              | no              | 1                | 12         | 29            | 41           | left  |
| NFS19 <sup>a,b</sup> | M      | no              | no              | 8                | 8          | 21            | 29           | right |
| NFS20 <sup>a,b</sup> | M      | no              | no              | 3                | 7          | 23            | 30           | right |
| NFS21 <sup>b</sup>   | M      | 2 <sup>nd</sup> | no              | 21 <sup>d</sup>  | 23         | 10            | 33           | right |
| NFS22 <sup>a</sup>   | F      | 2 <sup>nd</sup> | no              | 18               | 18         | 7             | 25           | left  |
| NFS23 <sup>a,b</sup> | F      | 3 <sup>rd</sup> | no              | 13               | 13         | 42            | 55           | right |

FR, familial recurrence; <sup>a</sup>case included in genomic analysis; <sup>b</sup>case included in MRI studies; <sup>c</sup>second or <sup>d</sup>third degree relative with epilepsy; <sup>e</sup>head trauma.  
doi:10.1371/journal.pone.0026268.t001

subgroup were  $7 \pm 1.8$  yrs. and  $2 \pm 0.5$  yrs. respectively. The remaining patients had no history of febrile IPI (NFS cases) and their average and standard error for t disease onset age and IPI were  $11.9 \pm 1.8$  yrs. and  $8.8 \pm 2.2$  respectively. Patient's age at surgery ranged from 13 to 57 years (mean age 32 years). Average duration of epilepsy before surgery was  $21.9 \pm 6$  years for FS and  $22.1 \pm 2.2$  years for NFS cases. Genomic studies of hippocampal CA3 encompassed 6 FS and 12 NFS cases. MRI studies included 4 FS and 8 NFS cases.

### Histopathology

It was possible to confirm in all cases that tissue sampling for genomic analysis corresponded more precisely to the CA3–CA4 transition (Figure 2 A–C). Typical aspects of hippocampal sclerosis were observed for all cases, including gliosis and neuronal cell loss in CA1, CA3 and hilus of the dentate gyrus (CA4), with a relative preservation of CA2 and subiculum. In the granule cell layer (Figure 2 D–F) neuronal cell loss was significantly higher ( $p < 0.05$ ) in FS cases (Figure S1, supporting information), whereas no significant differences between FS and NFS were found for cell dispersion and bilamination.

### MRI texture analysis

A computational pipeline combining MRI high resolution acquisitions, image processing, texture analysis and pattern

classification algorithms was used for image-based identification of histological features in the sclerotic hippocampi of 4 FS and 8 NFS cases. Classification procedures focused: i) cell loss and dispersion; ii) comparison between specimens from patients with or without antecedent febrile seizures history. The overall accuracies for correctly classified pixels were 90% for cell loss, 84% for cell dispersion and 90% for correlation with febrile history, thus showing that MRI texture features correlate with IPI.

### Transcriptome profile analysis

The comparison of CA3 global gene expression data between FS and NFS subgroups was performed using SAM procedure (5% false discovery rate) and yielded a total of 511 differentially expressed transcripts, all up-regulated (fold  $\geq 3.0$ ) in the FS subgroup. A subset of 335 genes annotated with Gene Ontology (GO) categories were found among these transcripts. Hierarchical clustering, performed by means of the TMEV 4.6.1 program, is presented as supporting information (Figure S2).

### Transcriptional interaction analysis

This analysis was accomplished using SAM-selected up-regulated GO annotated genes and the FunNet software. The strength of the links between each pair of genes was given by Spearman's correlation coefficient for expression profiles. The relevant biological themes, annotating differentially expressed

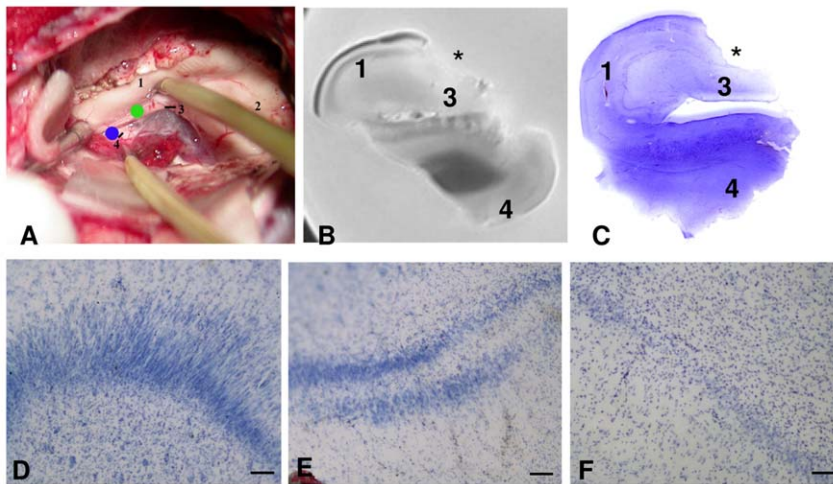

**Figure 2. Tissue sampling and histopathological results.** In **A**, surgical view of the hippocampus: (1) body of the hippocampus/CA1; (2) head of the hippocampus; (3) dentate gyrus/fimbria (green dot); (4) parahippocampal gyrus (blue dot). **B**, MRI of surgically resected hippocampus; **C–F** Nissl-stained hippocampal slices. In **B** and **C** the location of tissue resection for genomic analysis is marked with an asterisk showing the resection in the CA3–CA4 transition. **D–F** Cytoarchitectural alterations of the granule cell layer in sclerotic hippocampi. **D**: cell dispersion. **E**: bilamination. **F**: cell loss. Calibration bar = 100 microns.  
doi:10.1371/journal.pone.0026268.g002

genes, were indicated by significantly overrepresented categories from the GO Biological Processes (Figure 3). The overall distributions of the annotated genes by each GO category for FS and NFS subgroups appear as supporting information in Tables S1 and S2.

Figures 3A and 3B show the GO Biological Processes theme proximity networks for FS and NFS subgroups in that order. Intra- and inter-module links are indicated by solid or dotted lines, respectively. Although both networks comprised in essence the same themes, the sequence and link strengths of theme interactions were rather different. FS theme network was formed around three distinct modules: module 1 (triangle) displayed a theme cluster centered in synaptic transmission and ion transport; module 2 (square) was mainly related to dopamine signaling pathway, sodium ion transport and transmembrane transport; and module 3 (circle) was linked to glutamate signaling pathway and regulation of neuronal excitability. In the NFS network five distinct modules were formed (Figure 3B): modules 1 and 3 are mostly linked to synaptic plasticity and neurotransmitter transport, respectively; modules 2 and 4 are related to nervous system development and glutamate signaling pathway; and module 5 contains biological themes related to axonogenesis, ion transport and synaptic transmission.

The transcriptional interaction networks, or co-expression networks, for FS and NFS subgroups, depicted in Figures 4A and 4B respectively, were based on significantly over-represented GO Biological Processes categories. This analysis was accomplished using the Spearman's co-expression correlation for differentially expressed genes; therefore both networks were formed by the same set of differentially expressed genes. Co-expression coefficients  $\geq 0.85$ , corresponding to 870 out of 4,186 links between each pair of genes, were selected for FS network. The NFS network was constructed adopting co-expression coefficients from 0.14 up to 0.70, corresponding to 518 out of 4,186 links. In these networks the most relevant genes, or hubs, are the ones with the highest number of gene-gene links, graphically represented by the proportionally larger nodes. The number of gene-gene links distributed by link strength categories for FS and NFS subgroups is shown in Fig. 5. A list of the most relevant hubs

according to the number of gene-gene links appears in Table 2, together with their respective biological functions.

### FS co-expression network

The gene *CACNG2* formed the major hub (91 gene-gene links) and it was exclusive of this network. This gene codes for stargazin, a transmembrane receptor regulatory protein involved in the control of surface and synaptic expression of the excitatory AMPA-type glutamate receptors [24,25]. The gene *SSTR1* was the second FS major hub (76 gene-gene links) and, interestingly, it was also the major hub of the NFS network (see below). This gene is very relevant for epilepsy since it codes for a receptor of the endogenous antiepileptic somatostatin [26,27]. The third FS major hub (65 gene-gene links) was the gene *NELL1* (neural epidermal growth factor-like 1, [28]), which codes for a protein firstly found in neuroblastoma cell lines and possibly involved in controlling neural differentiation [29].

Two significant secondary hub clusters were identified in the FS network. One of these clusters, in which all hubs had 55 gene-gene links, comprised: i) the genes encoding the voltage-gated potassium (*KCNMA1*) and sodium (*SCN3B*) channels [30,31]; ii) *SLC32A1*, a gene coding for a vesicular GABA transporter [32]; iii) *D4S234E*, alias *NEEP21*, which codes for a protein with a pivotal role in the hippocampal recycling and internalization of AMPA-receptors [33,34]; iv) *LPPR4*, a gene involved in the modulatory control of hippocampal excitability, preventing hyperexcitability in glutamatergic neurons [35]; v) *SLC2A3*, alias *GLUT3*, the main neuronal glucose-transporter [36]; vi) *YWHAH*, a candidate gene for autosomal dominant familial partial epilepsy with variable foci [37], which codes for a neural protein that mediates signal transduction by binding to phosphoserine-containing proteins [38,39] and vii) *MYT1L*, a zinc finger gene involved in the recruitment of histone deacetylase to regulate neural transcription [40].

The other cluster, with 49 gene-gene links per hub, included genes codifying for voltage-gated potassium (*KCNQ2*, [41]) and sodium (*SCN4B*, [42]; *SCN9A*, [43]) channels and for the GABA<sub>A</sub> receptor subunit (*GABRB3*, [44]), plus the genes *BAIAP2*, which codes for an adaptor protein highly expressed at postsynaptic density of excitatory synapses, regulating dendritic spine morpho-



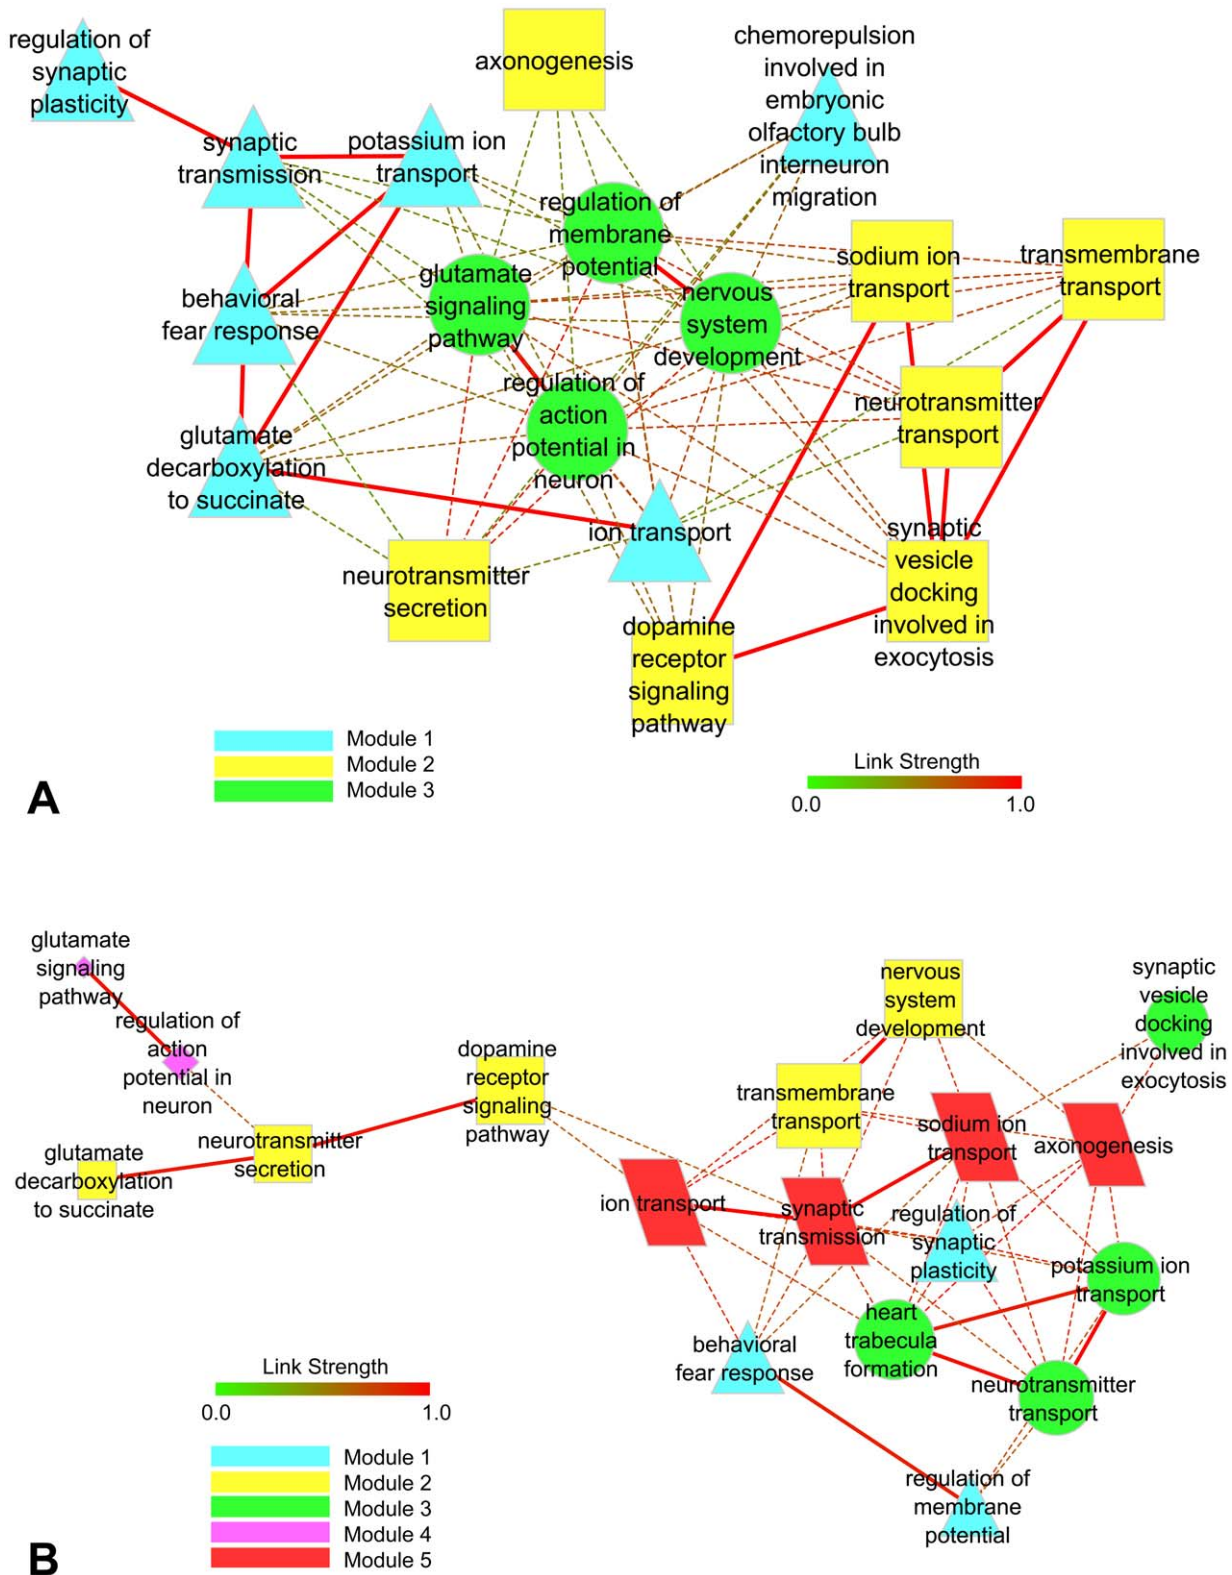

**Figure 3. Theme proximity network analysis for GO biological processes categories.** Thematic maps for FS and NFS subgroups appear in **A** and **B** respectively.  
doi:10.1371/journal.pone.0026268.g003

genesis and density [45], ISLR2, involved in the modulation of growth factor signals during neural development [46] and MFSD4, which codes for a protein (major facilitator superfamily

domain containing 4) that interacts with ELK transcription factors (up-regulated by nerve damage) in several regions of the nervous system [47].

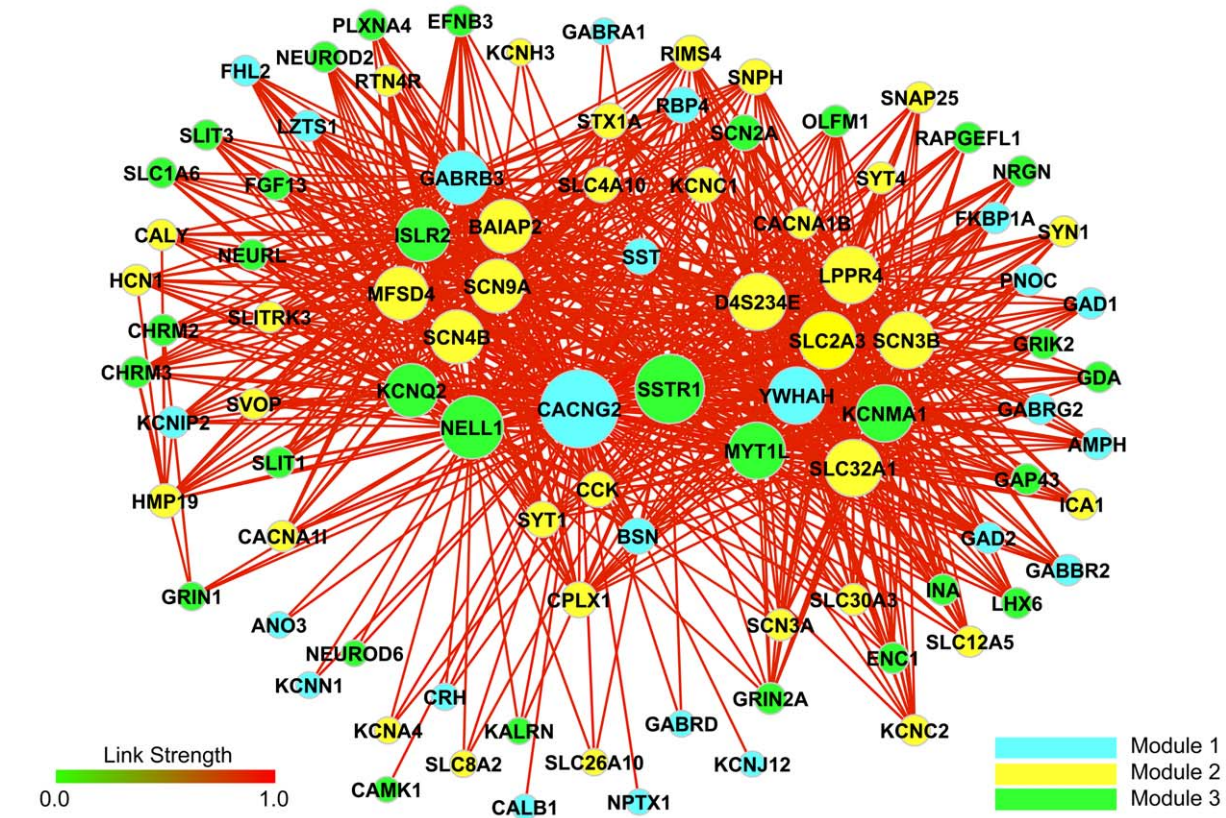

**A**

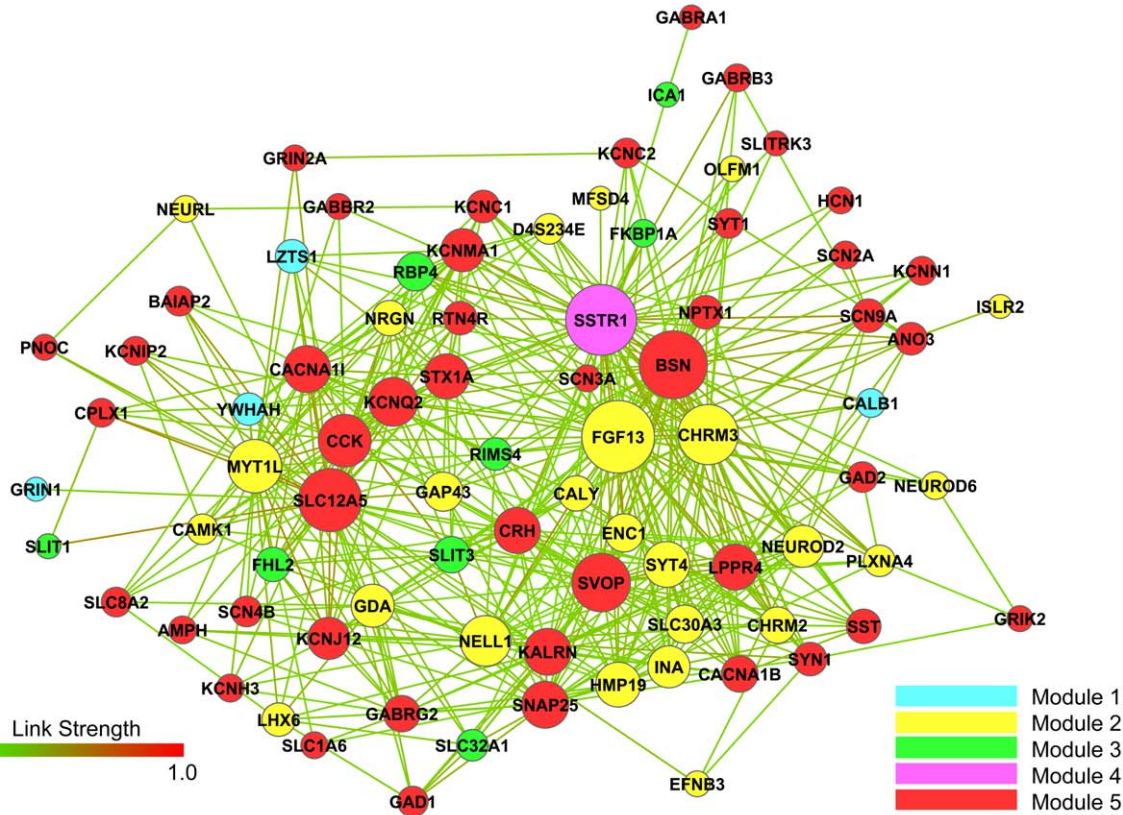

**B**

**Figure 4. Transcriptional interaction analysis for GO molecular processes.** Transcriptional interaction networks for FS and NFS subgroups appear in **A** and **B** respectively. doi:10.1371/journal.pone.0026268.g004



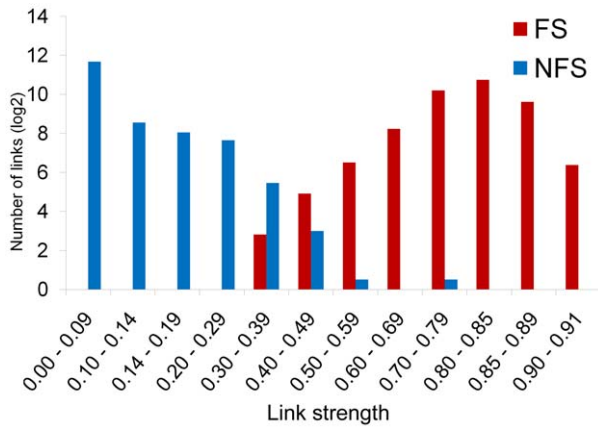

**Figure 5. Gene-gene link strength category distribution.** Number of gene-gene links distributed by link strength categories for FS (red bar) and NFS (blue bar). doi:10.1371/journal.pone.0026268.g005

### NFS co-expression network

Here the gene *SSTR1* appeared again as a major hub (50 links), but together with *FGF13* (52 links), which codes for a voltage-gated sodium channel modulator [48] and is involved in nervous system development [49], *BSN* (47 links), that codes for Bassoon, a protein engaged in organizing  $Ca^{2+}$  channel clustering, synaptic vesicle docking and speeding of synapse reloading at excitatory synapses [50,51] and *CHRM3* (39 links), a muscarinic acetylcholine receptor involved in the cholinergic neuromodulation of hippocampal circuitry [52].

Two relevant secondary hub clusters, predominantly related to NFS thematic modules 2 (nervous system development) and 5 (axonogenesis, ion transport), were identified in this network. One was formed around the gene *SLC12A5* (42 links), alias *KCC2*, a gene encoding the neuron-specific K-Cl cotransporter involved in the modulation of GABA-ergic transmission [53] and with a central role in promoting inhibition and preventing hyperexcitability in human hippocampus [54,55]. The other was centered in *SVOP* (37 links), a gene encoding for a transporter-like protein localized to neurotransmitter-containing vesicles [56]. The *SLC12A5* cluster included *MTY1L*, the axonogenesis-related gene *CCK* [57], *KCNQ2* and *CACNA1I*, which codes for a T-type calcium channel [58]. The *SVOP* cluster contained as significant hubs the genes *NELL1* and *KARLN* [59], both related to neural development, and *SNAP25*, a member of the SNARE superfamily involved in the regulation of synaptic vesicle exocytosis [60]. Additionally, overall gene-gene link strength was diminished in relation to the values observed for the FS network (see Figure 5), possibly reflecting higher phenotypic and clinical heterogeneities among afebrile cases. The significance of these findings for clarifying the molecular pathomechanisms involved in RMTLE and for the identification of novel and/or phenotype-specific therapeutic target candidates will be discussed below.

### qPCR Validation

In order to validate the DNA microarray data five up-regulated genes - *NELL1*, *NEURL*, *NEUROD6*, *SVOP* and *SYT1* - were selected for real-time quantitative PCR (qPCR) analysis. The fold-changes for each gene, comparing FS versus NFS group's average relative gene expression, confirmed DNA microarray results (Figure S3).

### Discussion

Through the use of a systems biology approach, based on the comparative analysis of CA3 transcriptional interaction networks

from RMTLE patients with (FS) or without (NFS) antecedent childhood febrile seizures, we were able to demonstrate that febrile and afebrile RMTLE constitute two distinct genomic phenotypes. MRI texture analysis of dentate gyrus also differentiated FS and NFS subgroups and histological examination showed higher neuronal cell loss in FS hippocampi, thus representing a morphological counterpart for the genomic findings. The uniqueness of FS genomic signature is supported by a recent epidemiologic survey on temporal lobe epilepsy (TLE) patients with (TLE-FS) or without (TLE-NFS) early childhood febrile seizures based on age of onset, seizure type and ictal symptoms and familial recurrence, that placed TLE-FS as phenotype distinct from afebrile TLE [61]. Similar conclusions came from a study of neuropathologic features of resected hippocampi from RMTLE patients where morphological alterations such as cell genesis and granule cell dispersion correlate with febrile IPI [62]. Therefore, the above-mentioned genomic and clinicopathological evidences confirm early clinical, imaging and epidemiological observations [3,10,63–66] pointing out to the relevance of febrile IPI in RMTLE.

Co-expression network analyses of FS and NFS transcriptomes revealed relevant commonalities and differences. The most striking commonality involves the gene *SSTR1*, a major hub in both networks. The *SSTR* gene family codes for the brain receptors of somatostatin (SST), a potent endogenous antiepileptic [26]. In rodents SST acts on dentate gyrus, CA1 and CA3 reducing epileptiform events. Therefore SST receptors expressed in these hippocampal areas are considered potential therapeutic targets for treating refractory temporal lobe epilepsy [27]. In rodents receptor subtypes 2 and 4 appear to mediate the majority of the antiepileptic actions of somatostatin [27]. In humans there are five *SSTR* genes [67] and *SSTR2* was found to be downregulated in CA1 and CA3 hippocampal explants surgically obtained from patients with temporal lobe epilepsy, probably reflecting increased neural cell loss in these areas and also the *SSTR2* involvement in antiepileptic processes [68]. Here we show that *SSTR1*, which is known to be expressed in human fetal central nervous system [69], is also expressed in CA3 hippocampal region of patients with RMTLE. Thus *SSTR1* and its product could be thus considered as potential therapeutic targets in RMTLE.

Two genes related to nervous system development, *MYT1L* and *NELL1*, also appeared as significant hubs in both networks. *MYT1L* is a neural specific zinc finger gene regulating neuronal transcription [40,70], oligodendrocyte differentiation [71] and cortical neuron progenitor development [72]. *NELL1* codes for a protein containing EGF-like repeats and its expression has been detected in fetal brain [28] and in central nervous system tumors [29], being probably active in controlling neural differentiation pathways. To our knowledge, this is the first description of the expression of both genes in human CA3 hippocampal cells. This expression could be interpreted as compensatory to the decreased hippocampal neurogenesis observed in temporal lobe epilepsy [18,19], which is particularly severe in dentate gyrus and CA1 and CA3 in RMTLE [62]. Several strategies have been devised to augment neurogenesis in the dentate gyrus in temporal lobe epilepsy [19]. However, it seems unsafe to consider *MYT1L* and *NELL1* in the scenario of gene therapy: the first has a widespread role in controlling neural differentiation processes through gene silencing [40] and the former is related to neoplastic processes in the brain. Moreover, there always the risk of promoting erroneous incorporation of newly formed neurons in hippocampal circuitry [19]. The same rationale discussed above applies to the nervous system development-related hubs *ISLR2* and *BAIAP2* in the FS network, as well as to the NFS axonogenesis-related secondary hubs *CCK* and *KARLN*.

**Table 2.** Main hubs in FS and/or NFS transcriptional interaction networks.

| Gene    | Number of       |                   | Gene product and/or biological function                                                                                                                                                   | Refs <sup>b</sup> |
|---------|-----------------|-------------------|-------------------------------------------------------------------------------------------------------------------------------------------------------------------------------------------|-------------------|
|         | gene-gene links |                   |                                                                                                                                                                                           |                   |
|         | FS              | NFS               |                                                                                                                                                                                           |                   |
| CACNG2  | <b>91</b>       | none <sup>a</sup> | stargazin;<br>transmembrane AMPA receptor regulatory protein                                                                                                                              | 24                |
| SSTR1   | <b>76</b>       | <b>50</b>         | somatostatin receptor 1                                                                                                                                                                   | 27                |
| NELL1   | <b>65</b>       | <b>29</b>         | neural differentiation control                                                                                                                                                            | 29                |
| SLC32A1 | <b>55</b>       | 9                 | GABA vesicular transporter                                                                                                                                                                | 32                |
| MYT1L   | <b>55</b>       | <b>32</b>         | regulation of neurotranscription & neural differentiation                                                                                                                                 | 40                |
| KCNMA1  | <b>55</b>       | 21                | calcium-activated potassium channel                                                                                                                                                       | 30                |
| YWHAH   | <b>55</b>       | 10                | mediation of signal transduction in neurons;<br>synaptic transmission                                                                                                                     | 37                |
| SLC2A3  | <b>55</b>       | None <sup>a</sup> | alias GLUT3; main neuronal glucose transporter                                                                                                                                            | 36                |
| SCN3B   | <b>55</b>       | None <sup>a</sup> | sodium channel beta 3 subunit; sodium ion transport                                                                                                                                       | 31                |
| D4S234E | <b>55</b>       | 8                 | alias NEEP21; AMPA receptor recycling in neurons                                                                                                                                          | 34                |
| LPPR4   | <b>55</b>       | <b>24</b>         | (alias PRG1)<br>control of hippocampal excitatory transmission                                                                                                                            | 35                |
| KCNQ2   | <b>49</b>       | <b>27</b>         | voltage-gated potassium channel                                                                                                                                                           | 41                |
| SCN4B   | <b>49</b>       | 8                 | voltage-gated sodium channel type IV, beta                                                                                                                                                | 42                |
| SCN9A   | <b>49</b>       | 11                | voltage-gated sodium channel type IX                                                                                                                                                      | 43                |
| MFSD4   | <b>49</b>       | 1                 | major facilitator superfamily containing domain 4,<br>involved in nerve damage repair                                                                                                     | 47                |
| ISLR2   | <b>49</b>       | 1                 | modulation of growth factors signals during<br>neural development                                                                                                                         | 46                |
| BAIAP2  | <b>49</b>       | 7                 | regulation of dendritic spine morphogenesis and density                                                                                                                                   | 45                |
| GABRB3  | <b>49</b>       | 5                 | GABA(A) receptor (GABAR) beta 3 subunit                                                                                                                                                   | 44                |
| FGF13   | 10              | <b>52</b>         | (alias FHF2) binding/modulation of voltage-gated sodium<br>channel; nervous system development                                                                                            | 48,49             |
| CHRM3   | 11              | <b>39</b>         | cholinergic neuromodulation of hippocampal circuitry                                                                                                                                      | 52                |
| BSN     | 18              | <b>47</b>         | (Bassoon) speeding of vesicle reloading at<br>excitatory synapses                                                                                                                         | 51                |
| SLC12A5 | 10              | <b>42</b>         | (alias KCC2) potassium-chloride cotransporter;<br>modulation of neuronal excitability                                                                                                     | 54                |
| CCK     | 18              | <b>31</b>         | output regulation of distinct types of inhibitory<br>interneurons in the hippocampus                                                                                                      | 57                |
| SVOP    | 18              | <b>37</b>         | transporter-like protein that localizes to<br>neurotransmitter-containing vesicles                                                                                                        | 77                |
| KARLN   | 3               | <b>25</b>         | Kalirin, brain-specific guanine-nucleotide exchange<br>factor (GEF) for the Rho family of small GTPases;<br>maintenance of hippocampal pyramidal neuron dendrites<br>and dendritic spines | 59                |
| SNAP25  | 10              | <b>25</b>         | SNARE superfamily protein; regulation of synaptic<br>vesicle exocytosis                                                                                                                   | 60                |
| CACNA1I | 10              | <b>25</b>         | Voltage-dependent calcium channel controlling<br>rapid entry of Ca(2+)                                                                                                                    | 58                |

<sup>a</sup>Link strength coefficient <0.10. <sup>b</sup>References. Bold numbers indicate hubs in FS and/or NFS subgroups.  
doi:10.1371/journal.pone.0026268.t002

The significant hub differences among FS and NFS interaction networks encompass genes that fall in two main categories: modulators of neurotransmission and modulators of intrinsic membrane excitability. The modulators of neurotransmission

include genes related to i) glutamatergic pathways and excitatory transmission; ii) GABAergic transmission and iii) synaptic transmission. These hub differences and their biological significance are briefly discussed below.



The genes acting on glutamatergic pathways and excitatory transmission have more relevance (considering gene-gene links) in the FS network, forming two of its major and exclusive hubs, namely CACNG2 (stargazin) and SLC2A3 (alias GLUT3). The first is essential for stabilizing diffuse AMPA receptors in the post synaptic density, an important feature of glutamatergic synaptic transmission [73]. The second is the main neuronal glucose transporter and modulates brain glucose uptake, being therefore relevant for excitatory transmission processes [74]. The genes D4S234 (alias NEEP21), involved in AMPA receptor recycling in neurons [33] and LPPR4 (alias PRG1), a controller of hippocampal excitatory transmission [35] also constitute major FS hubs related to neurotransmission modulation (Table 2), whereas BSN, a gene engaged in the speeding of vesicle reloading at excitatory synapses [50] is the sole major NFS hub in this group, with LPPR4 constituting a secondary hub.

Regarding the modulators of GABAergic transmission, the major FS hubs are GABRB3, a gene coding a GABA<sub>A</sub> receptor subunit and in which mutations are known to cause childhood absence epilepsy [44], and SLC32A1, that codes for a vesicular GABA transporter [32]. In the NFS network the epilepsy-associated gene SLC12A5 (alias KCC2) appears as a very relevant hub. KCC2 by governing cellular chloride concentrations enables GABA-A receptor activation to hyperpolarize the cell and may represent an intrinsic antiepileptogenic mechanism [75]. Loss of KCC2 may render activation of the receptor depolarizing. Reduction of its expression in subicular regions adjacent to sclerotic areas of the hippocampus has been associated to epileptiform activity [55].

The four genes related to neurotransmission modulation form relevant hubs only in the NFS co-expression network. Three of these genes are involved with synaptic vesicle function: SVOP, a nucleotide and ion transporter-protein [76,77]; SNAP-25, a fundamental component of the SNARE complex used for fast synaptic communication in excitatory and inhibitory circuits [60] and BSN, that codes for Bassoon, a protein engaged in the speeding of synapse reloading at excitatory synapses [50,51]. The fourth gene in this group is CHR3, is a muscarinic acetylcholine receptor that confers differential cholinergic modulation to neurochemically distinct hippocampal basket cell subtypes [52]. Interestingly, early life seizures appear to increase the efficacy of muscarinic receptors coupling to protein G accounting for adult susceptibility to epilepsy, what makes this gene a potential target for novel anticonvulsant drugs [78].

In the category of modulators of intrinsic membrane excitability, the FS network has as significant hubs KCNMA1, a gene involved in the regulation of action potential in neurons and whose defective expression plays a critical role in the pathogenesis of mesial temporal lobe epilepsy [30] and SCN3B, which codes for a calcium-activated potassium channel and whose downregulation is associated to hippocampal sclerosis [23,31]. Interestingly, this gene has 55 gene-gene links in the FS network but none in the NFS (Table 2). Also in the FS network are the genes SCN4B/ SCN9A, involved in sodium ion transport, and KCNQ2, a voltage-gated potassium channel, all relevant for the regulation of neuronal excitability. The NFS network displays in this category only two significant hubs formed by the genes FGF13, a voltage-gated calcium channel modulator, and CACNA1I, a calcium-signaling gene responsible for neuronal excitation [79].

The general picture that emerges from the analysis of co-expression networks shows that the FS distinctive hubs are mostly linked to glutamatergic signalization while in the NFS network the majority of the distinctive hubs involve GABAergic pathways and neurotransmission modulation. Both networks have relevant hubs

related to nervous system development, what is consistent with the cell genesis activity described in the hippocampus of RMTLE patients [19,62]. Moreover, two candidate genes for therapeutic targeting came out from this analysis: SSTR1, a relevant common hub in febrile and afebrile transcriptomes, and CHR3, due to its putative role in epilepsy susceptibility development.

In conclusion, the experimental design of this work, centered on the comparative studies of CA3 transcriptome and of dentate gyrus morphological features, was instrumental for characterizing febrile RMTLE as a distinct phenotype. The co-expression network analysis permitted to reveal molecular mechanisms underlying the refractory epilepsy phenotypes, pointing out two potential therapeutic targets represented by the genes SSTR1 and CHR3. Furthermore, the biological system approach adopted here proved to be a powerful tool for exploring the intricacies of the epilepsy molecular mechanisms, allowing the functional profiling of a large set of genomic data.

## Methods

### Patients

The RMTLE patients included in this study were selected through the CInAPCe-FAPESP Program ([www.fapesp.br/en/](http://www.fapesp.br/en/); [www.cinapce.org.br](http://www.cinapce.org.br)), the largest Brazilian research program on epilepsy and neuroimaging. This research has been approved by the research ethics committees of Hospital das Clinicas da FMUSP and of Hospital Albert Einstein under numbers 251/05 and CAEE 0122.0.028.174.05 respectively. A written informed consent was obtained from all patients. Refractory epilepsy cases were defined as those who have not gained seizure control after treatment with three or more anticonvulsant drugs. All patients were submitted to clinical, electrophysiological, neuropsychological and neuroimaging evaluations before surgery. The patients were submitted to epilepsy surgery between February 2009 and August 2010.

### Brain tissue specimens for gene expression and neuropathological studies

Fresh ex-vivo explants from hippocampal CA3 of our patients were obtained at the surgery room (Figure 2A) and immediately preserved with RNAlater (Qiagen cat. no. 76106, Valencia, CA). The entire hippocampus was then removed. MRI and histological studies were accomplished in all removed hippocampi for neuropathology analysis and for confirming that the explants for gene expression were obtained at the proper site (Figure 2B–C).

### RNA extraction

Brain tissue explants from CA3 (3–4 mm<sup>3</sup>) were homogenized with TissueRupter (Qiagen, cat. no. 9001272 Valencia, CA) and total RNA was extracted from the homogenates using the RNeasy Lipid Tissue Kit (Qiagen cat. no. 74804, Valencia, CA) according to the manufacturer's instructions. RNA quality was assessed on the Agilent BioAnalyzer 2100 (Agilent, Santa Clara, CA). All samples were stored at –80°C until used in hybridization experiments.

### Microarray hybridization and gene expression analysis

In order to determine gene expression profiles, 44 K DNA microarrays (Agilent Technologies, cat no. G4845A Santa Clara, CA) were used. The procedures for hybridization followed the protocols provided by the manufacturer's instructions (One-Color Microarray-Based Gene Expression Analysis - Quick Amp Labeling). The images were captured by the reader Agilent Bundle according to the parameters recommended for bioarrays and extracted by Agilent Feature Extraction software version 9.5.3. Among the 45,015 spots present in each array only those with none or only one flag (i.e. low intensity, saturation, controls,

etc.) were selected for analysis using the R software version 2.11.1 (R Development Core Team, 2010) and the Lowess test for normalization. We identified 28,546 valid transcripts for the CA3 samples (6 FS and 12 NFS patients). By means of the TMEV software version 4.6.1 [80] we selected differentially expressed transcripts using the Significance Analysis of Microarrays (SAM) procedure, a statistical technique for finding significant genes in a set of microarray experiments [81]. The input data is gene expression measurements from a set of microarray experiments, as well as a response variable from each experiment. It uses repeated permutations of the data to determine if the expressions of any genes are significantly related to the response. The cutoff for significance is determined by a tuning parameter  $\delta$ , chosen by the user based on the false discovery rate. Here we used a 5% false discovery rate.

Hierarchical clustering was based on Pearson correlation and complete linkage. All microarray raw data has been deposited in GEO public database (<http://www.ncbi.nlm.nih.gov/geo>), a MIAME compliant database, under accession number GSE28674.

### Transcriptional interaction analyses (GO and Network analysis)

We used the FunNet software (<http://www.funnet.info>) - based on the Gene Ontology Consortium (GO, <http://www.geneontology.org>) genomic annotations - for performing the functional profiling of gene expression data and identifying the biological themes and gene-gene interactions in which the differentially expressed genes are involved. The parameters used in these analyses were Spearman co-expression correlation and 5% false discovery rate. Themes with significant relationship in the transcriptional expression space were associated to build transcriptional modules in a proximity network. A transcriptional interaction network, corresponding to the theme proximity network, was then obtained. Data analysis and visualization were accomplished through Cytoscape (version 2.8.0, [www.cytoscape.org](http://www.cytoscape.org)).

### qPCR

Differential gene expression data were validated through quantitative real-time polymerase chain reaction (qPCR). Specific primers for five selected genes (Table S3) were designed using the Primer-BLAST (Primer3 Input, version 0.4.0 and BLAST, available at <http://www.ncbi.nlm.nih.gov/tools/primer-blast/>). All samples were amplified in triplicates. Amplification reactions were performed in a 25  $\mu$ L final volume containing 1X SYBR Green mix (*Quantitect SYBR Green PCR kit*, QIAGEN, Hilden, DE), 10 pmol of each primer and 2  $\mu$ L cDNA (1/10 dilution, synthesized from 1  $\mu$ g of total RNA). Real time PCR amplifications were performed in Applied Biosystems StepOne Plus Real Time PCR System with StepOne software (Applied Biosystems, Forrest City, CA, USA) with the following cycling parameters: an initial hot start of 95°C for 15 min followed by 50 cycles of 95°C for 15 s and 60°C for 30 s. In order to normalize qPCR reactions, *GAPDH* was included as reference gene after checking that amplification curves for different 12 different CA3 RNA samples (6 from FS and 6 from the NFS patients) yielded essentially the same results. Relative expression was determined by the relative standard curve method and presented as fold change comparing FS versus NFS mean values.

### Neuropathology

Specimens obtained during epilepsy surgery were fixed in 4% paraformaldehyde in 0.1 M phosphate buffer for 24 h and then transferred to a solution of PF 1% plus sucrose 30% in PB 0.1 M for one week. Each hippocampus (25–30 mm length) was carefully

oriented, trimmed and sectioned in the plane perpendicular to its longitudinal axis. The entire hippocampus (head and body) was used in the present investigation (50–60 slices/patient). Because sections cut tangentially to the principal cell layers or at inconsistent angles from the longitudinal axis of the hippocampus can produce unusual histological features, considerable care was taken to ensure that all hippocampal sections were cut in a plane strictly perpendicular to the longitudinal axis of the hippocampus. Sixty-micron coronal slices through the entire extension of the hippocampus were obtained using a cryostat (−21°C). One out five slices were mounted on glass slides and stained with cresyl violet (Nissl). The histological pattern described in the [82] atlas was used to identify the normal cytoarchitectural features in every hippocampal section.

Semi-quantitative assessment of sclerotic hippocampi was made for each histological slice focusing on dentate gyrus abnormalities at hippocampal body. The following parameters were evaluated: gliosis, neuronal cell loss and cytoarchitectural disorganization (dispersion and bilamination). These features were graded from zero (no abnormality) to 3 (very intense abnormality). An additional grade 4 was included for neuronal cell loss, indicating absence of neurons in the region under examination. The mean value for each parameter was calculated in each individual case. Bilamination of granular cell layer was described as present (yes) or absent (no). Statistical analysis was accomplished using non-parametric Mann-Whitney t-test,  $p < 0.05$ .

### Dentate Gyrus MRI texture analysis

Image acquisitions of 12 hippocampi surgically obtained from 4 FS and 8 NFS cases (see Table 1) were performed in a 3.0T SIEMENS Magnetom TIM Trio scanner (80 cm bore, 40 mT/m, 230 mT/m/s) using a surface coil (“Loop 7”). Images were acquired with the hippocampus immersed in 1% paraformaldehyde in 0.1 M phosphate buffer, inside a BD Falcon™ 50 cc conical tube. High-resolution images were acquired using a TSE (Turbo Spin Echo) protocol, with TR = 3700 ms, TE = 76 ms, fat sat by IR, TF = 7, FA = 180, BW = 40, FOV = 43 mm (70% AP phase oversampling), a 512×512 matrix, slice thickness of 1.6 mm and 32 NEX. Attained in-plane resolution is 80  $\mu$ m×80  $\mu$ m and CNR = 15. In order to guide data extraction, regions of interest covering the dentate gyrus were manually drawn over the MRI images by a neuropathologist. Imaging data was then processed in a pipeline [83] consisting of preprocessing (noise filtering, background segmentation, intensity normalization), feature extraction (texture calculation) and analysis (data randomization, data resampling, and classification). Feature extraction was performed with the aid of a 9×9 points sliding window using a set of 150 texture parameters calculated for every pixel in the image, namely: co-occurrence matrix parameters [84]; run-length matrix parameters [85]; wavelet parameters [86]; fractal dimension [87]; Markov random field parameters [88] and Gabor filter parameters [89,90]. A data matrix containing texture information from the dentate gyrus of FS and NFS patients was assembled using Matlab (<http://www.mathworks.com/products/matlab/>). Classification procedures were executed using a random forest algorithm and the Weka [91] data mining workbench. Since the number of NFS patients was larger, the matrix was processed so to keep the number of samples equal for both classes thus avoiding bias in the classification. Results were attested using a 10-fold cross-validation methodology, where the entire data set is divided in 10 partitions and the process of training/testing is repeated 10 times. In each turn the classifier was calculated for 9 partitions and tested for the remaining one. The final results are the mean output of each turn. The kappa statistics was used to verify if the

agreement between classification and true classes exceeds chance levels. Values higher than zero indicate that the classification results were not merely caused by chance. Finally, a Receiver Operator Characteristic (ROC) curve was used to assess the quality of the trained classifier. A detailed description of the use of this methodology for assessing hippocampal sclerosis in MTLE will appear in another paper of our group headed by MC Alegro.

## Supporting Information

**Figure S1 Dentate gyrus histological features.** Neuronal cell loss and cell dispersion values are shown for FS (gray) and NFS (white) tissue samples. Histological features were graded from zero (no abnormality) to 3 (very intense abnormality). (TIF)

**Figure S2 Hierarchical clustering for differentially expressed genes.** Pearson correlation hierarchical clustering of 335 differentially expressed annotated genes across the FS and NFS subgroups. (TIFF)

**Figure S3 qPCR validation of DNA microarray data.** In **A** the boxplots comparing the DNA microarray expression values of five selected genes in FS (gray) and NFS (white) samples. In **B** qPCR expression fold changes comparing FS X NFS samples for the same genes showing upregulation in FS. (TIF)

## References

- Meyer AC, Dua T, Ma J, Saxena S, Birbeck G (2010) Global disparities in the epilepsy treatment gap: a systematic review. *Bull World Health Organ* 88: 260–266.
- Engel J (2001) Mesial Temporal lobe epilepsy: what have we learned? *The Neuroscientist* 7: 340–352.
- Cendes F (2004) Febrile seizures and mesial temporal sclerosis. *Curr Opin Neurol* 17: 161–164.
- Baulac S, Gourfinkel-An I, Nabbout R, Huberfeld G, Serratosa J, et al. (2004) Fever, genes and epilepsy. *Lancet Neurol* 3: 421–30.
- Wang YY, Smith P, Murphy M, Cook M (2010) Global Expression Profiling in Epileptogenesis: Does It Add to the Confusion? *Brain Pathol* 20: 1–16.
- Dubé CM, Brewster AL, Richichi C, Zha Q, Baram TZ (2007) Fever, febrile seizures and epilepsy. *Trends Neurosci* 30: 490–496.
- Majores M, Schoch S, Lie A, Becker AJ (2007) Molecular neuropathology of temporal lobe epilepsy: complementary approaches in animal models and human disease tissue. *Epilepsia* 48 (Suppl 2): 4–12.
- Dubé CM, Brewster AL, Baram TZ (2009) Febrile seizures: Mechanisms and relationship to epilepsy. *Brain Dev* 31: 366–371.
- Scantlebury M, Heida J (2010) Febrile seizures and temporal lobe epileptogenesis. *Epilepsy Res* 89: 27–33.
- McClelland S, Dubé CM, Yang J, Baram TZ (2011) Epileptogenesis after prolonged febrile seizures: Mechanisms, biomarkers and therapeutic opportunities. *Neurosci Lett* doi:10.1016/j.neulet.2011.02.032.
- O'Dell C, Shinnar S, Ballaban-Gil KR, Hornick M, Sigalova M, et al. (2005) Rectal diazepam gel in the home management of seizures in children. *Pediatr Neurol* 33: 166–172.
- Dubé C, Vezzani A, Behrens M, Bartfai T, Baram TZ (2005) Interleukin-1beta contributes to the generation of experimental febrile seizures. *Ann Neurol* 57: 152–155.
- Dubé CM, Ravizza T, Hamamura M, Zha Q, Keebaugh A, et al. (2010) Epileptogenesis provoked by prolonged experimental febrile seizures: mechanisms and biomarkers. *J Neurosci* 30: 7484–7494.
- Nakayama J (2009) Progress in searching for the febrile seizure susceptibility genes. *Brain Dev* 31: 359–365.
- Lee TS, Mane S, Eid T, Zhao H, Lin A, et al. (2007) Gene expression in temporal lobe epilepsy is consistent with increased release of glutamate by astrocytes. *Mol Med* 13: 1–13.
- Siebzehnrubl FA, Blumcke I (2008) Neurogenesis in the human hippocampus and its relevance to temporal lobe epilepsies. *Epilepsia* 49(Suppl 5): 55–65.
- Mathern GW, Leiphart JL, De Vera A, Adelson PD, Seki T, et al. (2002) Seizures decrease postnatal neurogenesis and granule cell development in the human fascia dentata. *Epilepsia* 43 (Suppl 5): 68–73.
- Hattiangady B, Rao MS, Shetty A K (2004) Chronic temporal lobe epilepsy is associated with severely declined dentate neurogenesis in the adult hippocampus. *Neurobiol Dis* 17: 473–90.
- Hattiangady B, Shetty AK (2008) Implications of decreased hippocampal neurogenesis in chronic temporal lobe epilepsy. *Epilepsia*, 49: 26–41.
- Özbas-Gerçeker F, Redeker S, Boer K, Özgüç M, Sayge S, et al. (2006) Serial analysis of gene expression in the hippocampus of patients with mesial temporal lobe epilepsy. *Neuroscience* 138: 457–474.
- Jamali S, Bartolomei F, Robaglia-Schlupp A, Massacrier A, Peragut J, et al. (2006) Large-scale expression study of human mesial temporal lobe epilepsy: evidence for dysregulation of the neurotransmission and complement systems in the entorhinal cortex. *Brain* 129: 625–641.
- Arion D, Sabatini M, Unger T, Pastor J, Alonso-Nanclares L, et al. (2006) Correlation of transcriptome profile with electrical activity in temporal lobe epilepsy. *Neurobiol. Dis.* 22: 374–387.
- van Gassen KL, de Wit M, Koerkamp MJ, Rensen MG, van Rijen PC, et al. (2008) Possible role of the innate immunity in temporal lobe epilepsy. *Epilepsia* 49: 1055–1065.
- Diaz E (2010) Regulation of AMPA receptors by transmembrane accessory proteins. *Eur J Neurosci* 32: 261–268.
- Stein ELA, Chetkovich DM (2010) Regulation of stargazing synaptic trafficking by C-terminal PDZ ligand phosphorylation in bidirectional synaptic plasticity. *J Neurochem* 113: 42–53.
- Tallent MK, Siggins GR (1999) Somatostatin acts in CA1 and CA3 to reduce hippocampal epileptiform activity. *J Neurophysiol* 81: 1626–1635.
- Tallent MK, Qiu C (2008) Somatostatin: An endogenous antiepileptic. *Mol Cell Endocrinol* 286: 96–103.
- Watanabe TK, Katagiri T, Suzuki M, Shimizu F, Fujiwara T, et al. (1996) Cloning and characterization of two novel human cDNAs (NELL1 and NELL2) encoding proteins with six EGF-like repeats. *Genomics* 38: 273–276.
- Maeda K, Matsuhashi S, Tabuchi K, Watanabe T, Katagiri T, et al. (2001) Brain specific human genes, NELL1 and NELL2, are predominantly expressed in neuroblastoma and other embryonal neuroepithelial tumors. *Neurol Med Chir. Tokyo*, 41: 582–588.
- Ermolinsky B, Arshadmansab MF, Pacheco Otolara LF, Zarei MM, et al. (2008) Deficit of *Kennal* mRNA expression in the dentate gyrus of epileptic rats. *Neuroreport* 19: 1291–1294.
- van Gassen KL, de Wit M, van Kempen M, van der Hel WS, van Rijen PC, et al. (2009) Hippocampal Nabeta3 expression in patients with temporal lobe epilepsy. *Epilepsia* 50: 957–962.
- Gasnier B (2004) The SLC32 transporter, a key protein for the synaptic release of inhibitory amino acids. *Eur J Physiol* 447: 756–759.
- Steiner P, Sarria JC, Glauser L, Magnin S, Catsicas S, et al. (2002) Modulation of receptor cycling by neuron-enriched endosomal protein of 21 kD. *J Cell Biol* 157: 1197–1209.
- Alberi S, Boda B, Steiner P, Nikonenko I, Hirling H, et al. (2005) The endosomal protein NEEP21 regulates AMPA receptor-mediated synaptic transmission and plasticity in the hippocampus. *Mol Cell Neurosci* 29: 313–319.



35. Trimbuch T, Beed P, Vogt J, Schuchmann S, Maier N, et al. (2009) Synaptic PRG-1 modulates excitatory transmission via lipid phosphate-mediated signaling. *Cell* 138: 1222–1235.
36. Gómez O, Ballester-Lurbe B, Poch E, Mesonero JE, Terrado J (2010) Developmental regulation of glucose transporters GLUT3, GLUT4 and GLUT8 in the mouse cerebellar cortex. *J Anat* 217: 616–623.
37. Morales-Corraliza J, Gómez-Garre P, Sanz R, Díaz-Otero F, Gutiérrez-Delicado E, et al. (2010) Familial partial epilepsy with variable foci: a new family with suggestion of linkage to chromosome 22q12. *Epilepsia* 51: 1910–1914.
38. Yaffe MB, Rittinger K, Volinia S, Caron PR, Aitken A, et al. (1997) The structural basis for 14-3-3: phosphopeptide binding specificity. *Cell* 91: 961–971.
39. Kao HT, Porton B, Hilfiker S, Stefani G, Pieribone VA, et al. (1999) Molecular evolution of the synapsin gene family. *J Exp Zool* 285: 360–377.
40. Romm E, Nielsen JA, Kim JG, Hudson LD (2005) Myt1 family recruits histone deacetylase to regulate neural transcription. *J Neurochem* 93: 1444–1453.
41. Hahn A, Neubauer BA (2009) Sodium and potassium channel dysfunctions in rare and common idiopathic epilepsy syndromes. *Brain Dev* 31: 515–520.
42. Bant JS, Raman IM (2010) Control of transient, resurgent, and persistent current by open-channel block by Na channel beta4 in cultured cerebellar granule neurons. *Proc Natl Acad Sci U S A* 107: 12357–12362.
43. Singh NA, Pappas C, Dahle EJ, Claes LRF, Pruess TH, et al. (2009) A role of SCN9A in human epilepsies, as a cause of febrile seizures and as a potential modifier of Dravet Syndrome. *PLoS Genet* 5: e1000649.
44. Macdonald RL, Kang JQ, Gallagher MJ (2010) Mutations in GABAA receptor subunits associated with genetic epilepsies. *J Physiol* 588(Pt 11): 1861–1869.
45. Choi J, Ko J, Racz B, Burette A, Lee JR, et al. (2005) Regulation of dendritic spinemorphogenesis by insulin receptor substrate 53, a downstream effector of Rac1 and Cdc42 small GTPases. *J Neurosci* 25: 869–879.
46. Mandai K, Guo T, St Hillaire C, Meabon JS, Kanning KC, et al. (2009) LIG family receptor tyrosine kinase-associated proteins modulate growth factor signals during neural development. *Neuron* 63: 614–627.
47. Kerr N, Pintzas A, Holmes F, Hobson SA, Pope R, et al. (2010) The expression of ELK transcription factors in adult DRG: novel isoforms, antisense transcripts and upregulation by nerve damage. *Mol Cell Neurosci* 44: 165–177.
48. Goetz R, Dover K, Laezza F, Shtrauzent N, Huang X, et al. (2009) Crystal structure of a fibroblast growth factor homologous factor (FHF) defines a conserved surface on FHFs for binding and modulation of voltage-gated sodium channels. *J Biol Chem* 284: 17883–17896.
49. Goldfarb M (2005) Fibroblast growth factor homologous factors: evolution, structure, and function. *Cytokine Growth Factor Rev* 16: 215–220.
50. Frank T, Rutherford MA, Strenze N, Neef A, Pangrsić T, et al. (2010) Bassoon and the synaptic ribbon organize Ca<sup>2+</sup> channels and vesicles to add release sites and promote refilling. *Neuron* 68: 724–738.
51. Hallermann S, Fejtova A, Schmidt H, Weyhermüller A, Silver RA, et al. (2010) Bassoon speeds vesicle reloading at a central excitatory synapse. *Neuron* 68: 710–723.
52. Cea-del Rio CA, Lawrence JJ, Tricoire L, Erdelyi F, Szabo G, et al. (2010) M3 muscarinic acetylcholine receptor expression confers differential cholinergic modulation to neurochemically distinct hippocampal basket cell subtypes. *J Neurosci* 30: 6011–6024.
53. Fiumelli H, Cancedda L, Poo MM (2005) Modulation of GABAergic transmission by activity via postsynaptic Ca<sup>2+</sup>-dependent regulation of KCC2 function. *Neuron* 48: 773–86.
54. Zhu L, Lovinger D, Delpire E (2005) Cortical neurons lacking KCC2 expression show impaired regulation of intracellular chloride. *Neurophysiol* 93: 1557–1568.
55. Muñoz A, Méndez P, DeFelipe J, Alvarez-Leefmans FJ (2007) Cation-chloride cotransporters and GABA-ergic innervation in the human epileptic hippocampus. *Epilepsia* 48: 663–673.
56. Yao J, Bajjalieh SM (2009) SVOP is a nucleotide binding protein. *PLoS One* 2009; 4(4): e3315.
57. Lee SH, Soltesz I (2011) Requirement for CB1 but not GABAB receptors in the cholecystokinin mediated inhibition of GABA release from cholecystokinin expressing basket cells. *J Physiol* 589(Pt4): 891–902.
58. Perez-Reyes E (2006) Molecular characterization of T-type calcium channels. *Cell Calcium* 40: 89–96.
59. Ma XM, Huang J, Wang Y, Eipper BA, Mains RE (2003) Kalirin, a multifunctional Rho guanine nucleotide exchange factor, is necessary for maintenance of hippocampal pyramidal neuron dendrites and dendritic spines. *J Neurosci* 23: 10593–10603.
60. Corradini I, Verderio C, Sala M, Wilson MC, Matteoli M (2009) SNAP-25 in neuropsychiatric disorders. *Ann N Y Acad Sci* 1152: 93–99.
61. Heuser K, Cvanarova M, Gjerstad L, Tauboll E (2011) Is temporal lobe epilepsy with childhood febrile seizures a distinctive entity? A comparative study. *Seizure* 20: 163–166.
62. Bae EK, Jung KH, Chu K, Lee ST, Kim JH, et al. (2010) Neuropathologic and clinical features of human medial temporal lobe epilepsy. *J. Clin. Neurol.* 6: 73–80.
63. Berg AT, Shinnar S, Levy SR, Testa FM (1999) Childhood-onset epilepsy with and without preceding febrile seizures. *Neurology* 53: 1742–1748.
64. Cendes F (2003) Partial epilepsies: overview. *Arq Neuropsiquiatr* 61(Suppl1): 1–7.
65. Abou-Khalil B, Krei L, Lazenby B, Harris PA, Haines JL, et al. (2007) Familial genetic predisposition, epilepsy localization and antecedent febrile seizures. *Epilepsy Res* 73: 104–110.
66. Heuser K, Nagelhus EA, Tauboll E, Indahl U, Berg PR, et al. (2010) Variants of the genes encoding AQP4 and Kir4 are associated with subgroups of patients with temporal lobe epilepsy. *Epilepsy Res* 1: 55–64.
67. Patel YC (1999) Somatostatin and its receptor family. *Front Neuroendocrinol* 20: 157–198.
68. Csaba Z, Pirker S, Lelouvier B, Simon A, Videau C, et al. (2005) Somatostatin receptor type 2 undergoes plastic changes in the human epileptic dentate gyrus. *J Neuropathol Exp Neurol* 64: 956–969.
69. Goodyer CG, Grigorakis SI, Patel YC, Kumar U (2004) Developmental changes in the expression of somatostatin receptors (1–5) in the brain, hypothalamus, pituitary and spinal cord of the human fetus. *Neuroscience* 125: 441–448.
70. Hudson LD, Romm E, Berndt JA, Nielsen JA (2011) A tool for examining the role of the zinc finger myelin transcription factor 1 (Myt1) in neural development: Myt1 knock-in mice. *Transgenic Res*; doi 10.1007/s11248-010-9470-x.
71. Nielsen JA, Maric D, Lau P, Barker JL, Hudson LD (2006) Identification of a novel oligodendrocyte cell adhesion protein using gene expression profiling. *J Neurosci* 26: 9881–9891.
72. Nielsen JA, Lau P, Maric D, Barker JL, Hudson LD (2009) Integrating microRNA and mRNA expression profiles of neuronal progenitors to identify regulatory networks underlying the onset of cortical neurogenesis. *BMC Neurosci* 98. Available: <http://www.biomedcentral.com/1471-2202/10/98>. Accessed 2011 May 19 10.
73. Bats C, Groc L, Choquet D (2007) The Interaction between Stargazin and PSD-95 Regulates AMPA Receptor Surface Trafficking. *Neuron* 53: 719–734.
74. Choerri C, Staines W, Miki T, Seino S, Messier C (2005) Glucose transporter plasticity during memory processing. *Neuroscience* 130: 591–600.
75. Khirug S, Ahmad F, Puskarjov M, Afzalov R, Kaila K, et al. (2010) A single seizure episode leads to rapid functional activation of KCC2 in the neonatal rat hippocampus. *J Neurosci* 30: 12028–12035.
76. Cho EY, Lee CJ, Son KS, Kim YJ, Kim SJ (2009) Characterization of mouse synaptic vesicle-2-associated protein (Msvop) specifically expressed in the mouse central nervous system. *Gene* 429: 44–48.
77. Yao J, Bajjalieh SM (2009) SVOP Is a Nucleotide Binding Protein. *PLoS ONE* 4(4): e3315. doi:10.1371/journal.pone.0005315.
78. Potier S, Sénécal J, Chabot JG, Psaropoulou C, Descarries L (2005) A pentylentetrazole-induced generalized seizure in early life enhances the efficacy of muscarinic receptor coupling to G-protein in hippocampus and neocortex of adult rat. *Eur J Neurosci* 21: 1828–1836.
79. Chemin J, Monteil A, Perez-Reyes E, Bourin E, Nargeot J, et al. (2002) Specific contribution of human T-type calcium channel isoforms (alpha1G), alpha1H and alpha1I) to neuronal excitability. *J Physiol* 540(Pt1): 3–14.
80. Saeed AI, Sharov V, White J, Li J, Liang W, et al. (2003) TM4: a free, open-source system for microarray data management and analysis. *Biotechniques* 34: 374–378.
81. Tusher V, Tibshirani R, Chu G (2001) Significance analysis of microarrays applied to transcriptional responses to ionizing radiation. *Proc Natl Acad Sci USA* 98: 5116–5121.
82. Duvernoy HM, Vannson JL (1988) *The Human Hippocampus: An Atlas of Applied Anatomy*. Heidelberg: Springer Verlag. 166 p.
83. Kassner A, Thornhill RE (2010) *Texture Analysis: A Review of Neurologic MR Imaging Applications*. *Am J Neuroradiol* 31: 809–816.
84. Haralick RM (1979) Statistical and structural approaches to texture. *Proceedings of IEEE* 67: 786–804.
85. Chu A, Sehgal CM, Greeleaf JF (1990) Use of Gray Value Distribution of Run Length for Texture Analysis. *Pattern Recognit Lett* 11: 412–420.
86. Sasikala M, Kumaravel N (2008) A wavelet-based optimal texture feature set for classification of brain tumours. *J Med Eng Technol* 32: 198–205.
87. Zook JM, Iftikharuddin KM (2005) Statistical analysis of fractal-based brain tumor detection algorithms. *Magn Reson Imaging* 23: 671–678.
88. Manjunath BS, Chellappa R (1991) Unsupervised Texture Segmentation Using Markov Random Field Models. *IEEE Trans Pattern Anal Mach Intell* 13: 478–482.
89. Grigorescu SE, Petkov N, Kruzinga P (2002) Comparison of texture features based on Gabor filters. *IEEE Trans Image Process* 11: 1160–67.
90. Zacharaki E, Wang S, Chawla S, Yoo DS, Wolf R, et al. (2009) Classification of Brain Tumor Type and Grade Using MRI Texture and Shape in a Machine Learning Scheme. *Magn Reson Med* 62: 1609–1618.
91. Hall M, Eibe F, Holmes G, Pfahringer B, Reutemann P, et al. (2009) The WEKA Data Mining Software: An Update *SIGKDD Explorations* 11: 10–18.
